# Supplementary material for: Transcriptome of Cultured Lung Fibroblasts in Idiopathic Pulmonary Fibrosis: Meta-Analysis of Publically Available Microarray Datasets Reveals Repression of Inflammation and Immunity Pathways
Source: MDPI journal article supplement (doi:10.3390/ijms17122091), 2016-12-13
Supplement: s1 [file s1]

# Supplementary Materials: Transcriptome of Cultured Lung Fibroblasts in IDIOPATHIC Pulmonary Fibrosis: Meta-Analysis of Publically Available Microarray Datasets Reveals Repression of Inflammation and Immunity Pathways

Laurent Plantier, Hélène Renaud, Renaud Respaud, Sylvain Marchand-Adam and Bruno Crestani

**Table S2.** Differentially expressed genes. Gene ID, q-values, the differential expression expressed in Standard Deviations are provided. Previous association with fibrogenesis is indicated along with a relevant reference.

| Upregulated Transcripts |             |                              |                          |           |
|-------------------------|-------------|------------------------------|--------------------------|-----------|
| Gene ID                 | q-Value (%) | Differential Expression (SD) | Involved in Fibrogenesis | Reference |
| <i>NAP1L3</i>           | 0.00        | 1.49                         |                          |           |
| <i>PTHLH</i>            | 0.00        | 1.10                         |                          |           |
| <i>KIAA0355</i>         | 0.00        | 1.12                         |                          |           |
| <i>LIMS2</i>            | 0.00        | 1.24                         | Heart                    | [1]       |
| <i>ASB1</i>             | 0.00        | 1.16                         |                          |           |
| <i>HHAT</i>             | 0.00        | 1.32                         |                          |           |
| <i>EIF1</i>             | 0.00        | 1.04                         |                          |           |
| <i>PAWR</i>             | 0.00        | 1.15                         |                          |           |
| <i>NREP</i>             | 0.00        | 1.20                         |                          |           |
| <i>CTGF</i>             | 0.00        | 1.09                         | Multiple including lung  | [2]       |
| <i>FTSJ1</i>            | 0.00        | 1.20                         |                          |           |
| <i>TES</i>              | 0.00        | 1.01                         |                          |           |
| <i>FAM168A</i>          | 0.00        | 1.06                         |                          |           |
| <i>PDZD8</i>            | 0.00        | 1.11                         |                          |           |
| <i>ZMIZ1</i>            | 0.00        | 1.09                         |                          |           |
| <i>SIPA1L1</i>          | 0.00        | 1.02                         | Liver                    | [3]       |
| <i>FSTL3</i>            | 1.27        | 1.11                         | Heart                    | [4]       |
| <i>ADO</i>              | 1.27        | 1.03                         |                          |           |
| <i>XYLT1</i>            | 1.27        | 1.09                         | Skin                     | [5]       |
| <i>STAT5B</i>           | 1.27        | 0.78                         |                          |           |
| <i>SLC38A1</i>          | 1.27        | 0.93                         |                          |           |
| <i>VDR</i>              | 1.93        | 0.98                         | Multiple including lung  | [6]       |
| <i>LIMK2</i>            | 1.93        | 1.15                         | Genital                  | [7]       |
| <i>TUBB2A</i>           | 1.93        | 1.00                         |                          |           |
| <i>GLRX2</i>            | 1.93        | 0.99                         | Heart                    | [8]       |
| <i>EEF1B2</i>           | 1.93        | 1.70                         |                          |           |
| <i>SERINC5</i>          | 1.93        | 1.03                         |                          |           |
| <i>CDH2</i>             | 1.93        | 0.96                         | Multiple including lung  | [9]       |
| <i>MFAP3L</i>           | 1.93        | 0.87                         |                          |           |
| <i>EIF3J</i>            | 1.93        | 0.99                         |                          |           |
| <i>TMEM90B</i>          | 2.92        | 1.01                         |                          |           |
| <i>KRT33B</i>           | 2.92        | 1.01                         |                          |           |
| <i>AUTS2</i>            | 2.92        | 0.96                         |                          |           |
| <i>CALB2</i>            | 2.92        | 1.02                         |                          |           |
| <i>DACT1</i>            | 2.92        | 1.20                         |                          |           |
| <i>HES1</i>             | 2.92        | 0.85                         | Lung                     | [10]      |
| <i>GPX7</i>             | 2.92        | 0.95                         |                          |           |
| <i>PLEKHA3</i>          | 2.92        | 1.17                         |                          |           |

Table S2. Cont.

| Upregulated Transcripts |             |                              |                          |           |
|-------------------------|-------------|------------------------------|--------------------------|-----------|
| Gene ID                 | q-Value (%) | Differential Expression (SD) | Involved in Fibrogenesis | Reference |
| SLC25A32                | 2.92        | 1.00                         |                          |           |
| TEX2                    | 2.92        | 1.08                         |                          |           |
| JMJD6                   | 2.92        | 0.83                         |                          |           |
| ARL4A                   | 2.92        | 1.46                         |                          |           |
| UBL3                    | 2.92        | 0.92                         |                          |           |
| SLC1A4                  | 2.92        | 0.92                         |                          |           |
| AMIGO2                  | 3.31        | 0.82                         |                          |           |
| PPRC1                   | 3.31        | 0.94                         |                          |           |
| GMPPB                   | 3.31        | 0.97                         |                          |           |
| C19orf61                | 3.31        | 1.05                         |                          |           |
| PRSS3                   | 3.31        | 0.98                         |                          |           |
| FERMT2                  | 3.31        | 0.94                         |                          |           |
| CIB1                    | 3.31        | 0.79                         | heart                    | [11]      |
| SRF                     | 3.31        | 0.89                         | Multiple including lung  | [12]      |
| FAM168B                 | 3.31        | 0.85                         |                          |           |
| TTC3                    | 3.31        | 0.88                         |                          |           |
| RSU1                    | 3.31        | 0.86                         |                          |           |
| PLP2                    | 3.31        | 0.88                         |                          |           |
| KLC1                    | 3.31        | 0.75                         |                          |           |
| HSPB7                   | 3.31        | 0.83                         | Muscle                   | [13]      |
| EPRS                    | 3.31        | 0.85                         |                          |           |
| ATP13A2                 | 3.31        | 1.14                         |                          |           |
| TARS                    | 3.31        | 0.99                         | Lung                     | [14]      |
| MTCH1                   | 3.31        | 1.23                         |                          |           |
| SNF8                    | 3.31        | 1.32                         |                          |           |
| MGC4294                 | 3.31        | 1.07                         |                          |           |
| FAM195B                 | 3.31        | 1.00                         |                          |           |
| THUMPD2                 | 3.31        | 1.14                         |                          |           |
| VLDLR                   | 3.31        | 0.93                         |                          |           |
| SLC25A15                | 3.31        | 0.95                         |                          |           |
| SARS                    | 3.31        | 0.76                         |                          |           |
| ERI3                    | 3.31        | 0.85                         |                          |           |
| PDLIM3                  | 3.31        | 0.91                         |                          |           |
| OR7E156P                | 3.31        | 1.02                         |                          |           |
| CHST11                  | 3.31        | 0.92                         |                          |           |
| CHUK                    | 3.31        | 0.89                         | Liver                    | [15]      |
| FUBP3                   | 3.31        | 0.89                         |                          |           |
| RBP1                    | 3.31        | 0.77                         | Liver                    | [16]      |
| MAPRE1                  | 3.31        | 1.26                         |                          |           |
| BICD2                   | 3.31        | 0.85                         |                          |           |
| WDR1                    | 3.31        | 0.88                         |                          |           |
| CADM1                   | 3.81        | 0.85                         | Lung                     | [17]      |
| HDGFRP3                 | 3.81        | 1.09                         |                          |           |
| NUAK1                   | 3.81        | 0.87                         |                          |           |
| TUBB2A                  | 3.81        | 1.58                         |                          |           |
| LOC285359               | 3.81        | 2.27                         |                          |           |
| ARFGAP1                 | 3.81        | 0.92                         |                          |           |
| SLC19A2                 | 3.81        | 0.92                         |                          |           |
| ETV5                    | 3.81        | 0.84                         |                          |           |
| ATP6V0B                 | 3.81        | 0.91                         |                          |           |
| CAMTA2                  | 3.81        | 0.85                         |                          |           |
| TIMP3                   | 3.81        | 0.83                         | Multiple including lung  | [18]      |
| ABAT                    | 3.81        | 0.73                         |                          |           |

Table S2. Cont.

| Upregulated Transcripts   |             |                              |                          |           |                                                                                                                |                                                                      |
|---------------------------|-------------|------------------------------|--------------------------|-----------|----------------------------------------------------------------------------------------------------------------|----------------------------------------------------------------------|
| Gene ID                   | q-Value (%) | Differential Expression (SD) | Involved in Fibrogenesis | Reference |                                                                                                                |                                                                      |
| <i>CMPK1</i>              | 3.81        | 0.99                         | Multiple including lung  | [19]      |                                                                                                                |                                                                      |
| <i>CCDC6</i>              | 3.81        | 0.96                         |                          |           |                                                                                                                |                                                                      |
| <i>PMEPA1</i>             | 3.81        | 1.15                         |                          |           |                                                                                                                |                                                                      |
| <i>SERP1</i>              | 3.81        | 0.89                         |                          |           |                                                                                                                |                                                                      |
| <i>TSTA3</i>              | 3.81        | 0.75                         |                          |           |                                                                                                                |                                                                      |
| <i>RBM3</i>               | 3.81        | 0.92                         |                          |           |                                                                                                                |                                                                      |
| <i>LRRC59</i>             | 3.81        | 1.15                         |                          |           |                                                                                                                |                                                                      |
| <i>FAM89B</i>             | 3.81        | 0.72                         |                          |           |                                                                                                                |                                                                      |
| <i>MSN</i>                | 4.47        | 1.28                         |                          |           |                                                                                                                |                                                                      |
| <i>COTL1</i>              | 4.47        | 2.36                         |                          |           |                                                                                                                |                                                                      |
| <i>NTM</i>                | 4.47        | 1.01                         |                          |           |                                                                                                                |                                                                      |
| <i>KIAA1217</i>           | 4.47        | 0.79                         |                          |           |                                                                                                                |                                                                      |
| <i>DVL3</i>               | 4.47        | 0.72                         |                          |           |                                                                                                                |                                                                      |
| <i>CIAO1</i>              | 4.47        | 0.78                         |                          |           |                                                                                                                |                                                                      |
| <i>MST4</i>               | 4.47        | 0.83                         |                          |           |                                                                                                                |                                                                      |
| <i>STRAP</i>              | 4.47        | 0.85                         |                          |           |                                                                                                                |                                                                      |
| <i>TXNL4A</i>             | 4.47        | 0.75                         |                          |           |                                                                                                                |                                                                      |
| <i>AKTIP</i>              | 4.47        | 1.06                         |                          |           |                                                                                                                |                                                                      |
| <i>KCNK7</i>              | 4.47        | 1.36                         |                          |           |                                                                                                                |                                                                      |
| <i>SLC3A2</i>             | 4.47        | 0.89                         |                          |           |                                                                                                                |                                                                      |
| <i>PREB</i>               | 4.47        | 1.02                         |                          |           |                                                                                                                |                                                                      |
| <i>NT5DC2</i>             | 4.47        | 0.96                         |                          |           |                                                                                                                |                                                                      |
| <i>TRIB1</i>              | 4.47        | 0.87                         |                          |           |                                                                                                                |                                                                      |
| <i>ITGBL1</i>             | 4.47        | 0.88                         |                          |           |                                                                                                                |                                                                      |
| Downregulated Transcripts |             |                              |                          |           |                                                                                                                |                                                                      |
| Gene ID                   | q-Value (%) | Differential Expression (SD) |                          |           | Involved in Fibrogenesis                                                                                       | Reference                                                            |
| <i>TRANK1</i>             | 0.00        | -1.23                        |                          |           | Skin<br>Lung<br><br>Liver<br><br>Multiple including lung<br><br>Cornea<br><br>Liver<br>Multiple including lung | [20]<br>[21]<br><br>[22]<br><br>[23]<br><br>[24]<br><br>[25]<br>[26] |
| <i>IFIT1</i>              | 0.00        | -1.20                        |                          |           |                                                                                                                |                                                                      |
| <i>SLC15A3</i>            | 0.00        | -1.36                        |                          |           |                                                                                                                |                                                                      |
| <i>C7orf58</i>            | 0.00        | -1.38                        |                          |           |                                                                                                                |                                                                      |
| <i>PLSCR1</i>             | 0.00        | -1.13                        |                          |           |                                                                                                                |                                                                      |
| <i>IL1R1</i>              | 0.00        | -1.12                        |                          |           |                                                                                                                |                                                                      |
| <i>IFI44</i>              | 0.00        | -1.11                        |                          |           |                                                                                                                |                                                                      |
| <i>HTATIP2</i>            | 0.00        | -0.99                        |                          |           |                                                                                                                |                                                                      |
| <i>PLEKHA4</i>            | 0.00        | -1.20                        |                          |           |                                                                                                                |                                                                      |
| <i>NFKBIA</i>             | 0.00        | -1.22                        |                          |           |                                                                                                                |                                                                      |
| <i>MAT2B</i>              | 0.00        | -1.35                        |                          |           |                                                                                                                |                                                                      |
| <i>GBP2</i>               | 0.00        | -1.11                        |                          |           |                                                                                                                |                                                                      |
| <i>SAMHD1</i>             | 0.00        | -1.07                        |                          |           |                                                                                                                |                                                                      |
| <i>SESN1</i>              | 0.00        | -1.15                        |                          |           |                                                                                                                |                                                                      |
| <i>TNFAIP2</i>            | 0.00        | -1.07                        |                          |           |                                                                                                                |                                                                      |
| <i>VWA5A</i>              | 0.00        | -1.06                        |                          |           |                                                                                                                |                                                                      |
| <i>STAT1</i>              | 0.00        | -1.04                        |                          |           |                                                                                                                |                                                                      |
| <i>SECTM1</i>             | 0.00        | -1.09                        |                          |           |                                                                                                                |                                                                      |
| <i>NINJ1</i>              | 0.00        | -1.21                        |                          |           |                                                                                                                |                                                                      |
| <i>TRPA1</i>              | 0.00        | -1.12                        |                          |           |                                                                                                                |                                                                      |
| <i>IDO1</i>               | 0.00        | -1.10                        |                          |           |                                                                                                                |                                                                      |
| <i>IL15RA</i>             | 0.00        | -1.06                        |                          |           |                                                                                                                |                                                                      |
| <i>PROCR</i>              | 0.00        | -1.02                        |                          |           |                                                                                                                |                                                                      |
| <i>IFITM3</i>             | 0.00        | -1.63                        |                          |           |                                                                                                                |                                                                      |
| <i>NFE2L3</i>             | 0.00        | -1.27                        |                          |           |                                                                                                                |                                                                      |

Table S2. Cont.

| Downregulated Transcripts |             |                              |                          |           |
|---------------------------|-------------|------------------------------|--------------------------|-----------|
| Gene ID                   | q-Value (%) | Differential Expression (SD) | Involved in Fibrogenesis | Reference |
| TRIM21                    | 0.00        | −1.02                        | Systemic sclerosis       | [27]      |
| DNPEP                     | 1.69        | −0.99                        |                          |           |
| SLC12A7                   | 1.69        | −1.13                        |                          |           |
| VPS39                     | 1.69        | −1.02                        | Skin                     | [28]      |
| SNX6                      | 1.69        | −1.56                        |                          |           |
| IFI35                     | 1.69        | −1.02                        |                          |           |
| TMEM140                   | 1.69        | −0.98                        |                          |           |
| LPAR6                     | 1.69        | −1.27                        |                          |           |
| TRAFD1                    | 1.69        | −1.02                        |                          |           |
| PYCARD                    | 1.69        | −1.07                        | Kidney                   | [29]      |
| ATP2B1                    | 1.69        | −0.90                        |                          |           |
| IFITM1                    | 1.69        | −0.98                        | Liver                    | [30]      |
| NECAP2                    | 1.69        | −1.02                        |                          |           |
| SLFN12                    | 1.69        | −1.03                        |                          |           |
| TNFRSF1B                  | 1.69        | −1.01                        |                          |           |
| BTN3A2                    | 1.69        | −1.05                        |                          |           |
| IFIT3                     | 1.69        | −0.97                        |                          |           |
| GSTK1                     | 1.69        | −1.28                        |                          |           |
| AKR1C3                    | 1.69        | −1.04                        | Skin                     | [31]      |
| FTL                       | 1.69        | −1.80                        |                          |           |
| SGCE                      | 1.69        | −0.94                        |                          |           |
| BBC3                      | 1.69        | −0.94                        | Lung                     | [32]      |
| ZNF395                    | 1.69        | −1.02                        |                          |           |
| MAN1A1                    | 1.69        | −0.88                        |                          |           |
| IL32                      | 1.69        | −1.23                        | Liver                    | [33]      |
| MX1                       | 1.69        | −0.96                        | Liver                    | [34]      |
| STOM                      | 2.00        | −1.01                        |                          |           |
| EIF2AK2                   | 2.00        | −0.92                        |                          |           |
| TRIM22                    | 2.00        | −0.96                        |                          |           |
| PSMB10                    | 2.00        | −1.02                        |                          |           |
| FAM110B                   | 2.00        | −1.04                        |                          |           |
| HLA-DMB                   | 2.00        | −0.80                        |                          |           |
| OAS2                      | 2.00        | −1.32                        |                          |           |
| S100A3                    | 2.00        | −0.92                        |                          |           |
| CASP1                     | 2.00        | −0.87                        | Multiple including lung  | [35]      |
| FAS                       | 2.00        | −0.86                        | Multiple including lung  | [36]      |
| RAB8B                     | 2.00        | −1.14                        |                          |           |
| RDH14                     | 2.00        | −1.27                        |                          |           |
| PSMA6                     | 2.00        | −1.14                        |                          |           |
| APOBEC3C                  | 2.00        | −0.99                        |                          |           |
| CXCL1                     | 2.00        | −0.92                        | Multiple including lung  | [37]      |
| UBA7                      | 2.00        | −0.92                        |                          |           |
| IL7R                      | 2.00        | −1.02                        |                          |           |
| CALHM2                    | 2.00        | −1.14                        |                          |           |
| ASPA                      | 2.00        | −1.20                        |                          |           |
| SDCBP                     | 2.92        | −1.13                        |                          |           |
| TNFRSF21                  | 2.92        | −1.02                        |                          |           |
| XAF1                      | 2.92        | −0.91                        |                          |           |
| TAP1                      | 2.92        | −1.50                        | Kidney                   | [38]      |
| SCNN1B                    | 2.92        | −1.18                        |                          |           |
| OAS3                      | 2.92        | −0.94                        |                          |           |
| WTAP                      | 2.92        | −0.81                        |                          |           |
| APOBEC3G                  | 2.92        | −1.06                        |                          |           |

Table S2. Cont.

| Downregulated Transcripts |             |                              |                          |           |
|---------------------------|-------------|------------------------------|--------------------------|-----------|
| Gene ID                   | q-Value (%) | Differential Expression (SD) | Involved in Fibrogenesis | Reference |
| HERC3                     | 2.92        | −0.92                        |                          |           |
| BCL6                      | 2.92        | −0.93                        |                          |           |
| IL10RB                    | 2.92        | −1.01                        | Skin                     | [39]      |
| MME                       | 2.92        | −0.90                        |                          |           |
| CBR3                      | 2.92        | −0.95                        |                          |           |
| PKIG                      | 2.92        | −1.00                        |                          |           |
| BTN3A3                    | 3.31        | −0.90                        |                          |           |
| AKR1B1                    | 3.31        | −0.87                        |                          |           |
| OAS1                      | 3.31        | −1.26                        | Multiple including lung  | [21]      |
| IRF9                      | 3.31        | −0.90                        | Liver                    | [40]      |
| CXCL2                     | 3.31        | −0.89                        | Multiple including lung  | [41]      |
| DOCK4                     | 3.81        | −0.85                        |                          |           |
| C14orf159                 | 3.81        | −0.91                        |                          |           |
| TDRD7                     | 3.81        | −0.84                        |                          |           |
| LY6E                      | 3.81        | −0.92                        |                          |           |
| GNAI1                     | 3.81        | −0.87                        |                          |           |
| CASP4                     | 3.81        | −0.83                        | Kidney                   | [42]      |
| RTP4                      | 3.81        | −1.16                        |                          |           |
| PSMB9                     | 3.81        | −0.91                        | Kidney                   | [38]      |
| ATG14                     | 3.81        | −1.33                        |                          |           |
| BLOC1S1                   | 3.81        | −0.92                        |                          |           |
| NFIB                      | 3.81        | −0.89                        |                          |           |
| PTGES                     | 4.47        | −0.84                        | Multiple including lung  | [43]      |
| C1RL                      | 4.47        | −1.00                        |                          |           |
| TNFRSF14                  | 4.47        | −1.03                        | Multiple including lung  | [44]      |
| ISG15                     | 4.47        | −0.85                        | Liver                    | [45]      |
| DHX58                     | 4.47        | −0.75                        |                          |           |
| MYLIP                     | 4.47        | −0.87                        |                          |           |
| ARHGAP28                  | 4.47        | −1.04                        |                          |           |
| ECHDC3                    | 4.47        | −1.06                        |                          |           |
| NR1H3                     | 4.47        | −1.10                        | Heart                    | [46]      |
| TRIAP1                    | 4.47        | −0.78                        |                          |           |
| RALGPS2                   | 4.47        | −1.13                        |                          |           |
| IFIT5                     | 4.47        | −0.80                        |                          |           |
| ANKFY1                    | 4.47        | −0.83                        |                          |           |

## References

1. Liang, X.; Sun, Y.; Ye, M.; Scimia, M.C.; Cheng, H.; Martin, J.; Wang, G.; Rearden, A.; Wu, C.; Peterson, K.L.; et al. Targeted ablation of PINCH1 and PINCH2 from murine myocardium results in dilated cardiomyopathy and early postnatal lethality. *Circulation* **2009**, *120*, 568–576.
2. Ihn, H. The role of TGF- $\beta$  signaling in the pathogenesis of fibrosis in scleroderma. *Arch. Immunol. Ther. Exp.* **2002**, *50*, 325–331.
3. Marfà, S.; Morales-Ruiz, M.; Oró, D.; Ribera, J.; Fernández-Varo, G.; Jiménez, W. Sipal11 is an early biomarker of liver fibrosis in CCl<sub>4</sub>-treated rats. *Biol. Open* **2016**, *5*, 858–865.
4. Panse, K.D.; Felkin, L.E.; López-Olañeta, M.M.; Gómez-Salinerio, J.; Villalba, M.; Muñoz, L.; Nakamura, K.; Shimano, M.; Walsh, K.; Barton, P.J.R.; et al. Follistatin-like 3 mediates paracrine fibroblast activation by cardiomyocytes. *J. Cardiovasc. Transl. Res.* **2012**, *5*, 814–826.
5. Faust, I.; Roch, C.; Kuhn, J.; Prante, C.; Knabbe, C.; Hendig, D. Human xylosyltransferase-I—A new marker for myofibroblast differentiation in skin fibrosis. *Biochem. Biophys. Res. Commun.* **2013**, *436*, 449–454.
6. Ramirez, A.M.; Wongtrakool, C.; Welch, T.; Steinmeyer, A.; Zügel, U.; Roman, J. Vitamin D inhibition of pro-fibrotic effects of transforming growth factor  $\beta$ 1 in lung fibroblasts and epithelial cells. *J. Steroid Biochem. Mol. Biol.* **2010**, *118*, 142–150.

7. Song, S.H.; Park, K.; Kim, S.W.; Paick, J.-S.; Cho, M.C. Involvement of Rho-Kinase/LIM Kinase/Cofilin Signaling Pathway in Corporal Fibrosis after Cavernous Nerve Injury in Male Rats. *J. Sex. Med.* **2015**, *12*, 1522–1532.
8. Mailloux, R.J.; Xuan, J.Y.; McBride, S.; Maharsy, W.; Thorn, S.; Holterman, C.E.; Kennedy, C.R.J.; Rippstein, P.; deKemp, R.; da Silva, J.; et al. Glutaredoxin-2 is required to control oxidative phosphorylation in cardiac muscle by mediating deglutathionylation reactions. *J. Biol. Chem.* **2014**, *289*, 14812–14828.
9. Kasper, M.; Haroske, G. Alterations in the alveolar epithelium after injury leading to pulmonary fibrosis. *Histol. Histopathol.* **1996**, *11*, 463–483.
10. Liu, T.; Hu, B.; Choi, Y.Y.; Chung, M.; Ullenbruch, M.; Yu, H.; Lowe, J.B.; Phan, S.H. Notch1 signaling in FIZZ1 induction of myofibroblast differentiation. *Am. J. Pathol.* **2009**, *174*, 1745–1755.
11. Heineke, J.; Auger-Messier, M.; Correll, R.N.; Xu, J.; Benard, M.J.; Yuan, W.; Drexler, H.; Parise, L.V.; Molkentin, J.D. CIB1 is a regulator of pathological cardiac hypertrophy. *Nat. Med.* **2010**, *16*, 872–879.
12. Sisson, T.H.; Ajayi, I.O.; Subbotina, N.; Dodi, A.E.; Rodansky, E.S.; Chibucos, L.N.; Kim, K.K.; Keshamouni, V.G.; White, E.S.; Zhou, Y.; et al. Inhibition of myocardin-related transcription factor/serum response factor signaling decreases lung fibrosis and promotes mesenchymal cell apoptosis. *Am. J. Pathol.* **2015**, *185*, 969–986.
13. Juo, L.-Y.; Liao, W.-C.; Shih, Y.-L.; Yang, B.-Y.; Liu, A.-B.; Yan, Y.-T. HSPB7 interacts with dimerized FLNC and its absence results in progressive myopathy in skeletal muscles. *J. Cell Sci.* **2016**, *129*, 1661–1670.
14. Marguerie, C.; Bunn, C.C.; Beynon, H.L.; Bernstein, R.M.; Hughes, J.M.; So, A.K.; Walport, M.J. Polymyositis, pulmonary fibrosis and autoantibodies to aminoacyl-tRNA synthetase enzymes. *Q. J. Med.* **1990**, *77*, 1019–1038.
15. Rotman, Y.; Koh, C.; Zmuda, J.M.; Kleiner, D.E.; Liang, T.J. NASH CRN The association of genetic variability in patatin-like phospholipase domain-containing protein 3 (PNPLA3) with histological severity of nonalcoholic fatty liver disease. *Hepatology* **2010**, *52*, 894–903.
16. Uchio, K.; Tuchweber, B.; Manabe, N.; Gabbiani, G.; Rosenbaum, J.; Desmoulière, A. Cellular retinol-binding protein-1 expression and modulation during in vivo and in vitro myofibroblastic differentiation of rat hepatic stellate cells and portal fibroblasts. *Lab. Investig.* **2002**, *82*, 619–628.
17. Paun, A.; Haston, C.K. Genomic and genome-wide association of susceptibility to radiation-induced fibrotic lung disease in mice. *Radiother. Oncol. J. Eur. Soc. Ther. Radiol. Oncol.* **2012**, *105*, 350–357.
18. Swiderski, R.E.; Dencoff, J.E.; Floerchinger, C.S.; Shapiro, S.D.; Hunninghake, G.W. Differential expression of extracellular matrix remodeling genes in a murine model of bleomycin-induced pulmonary fibrosis. *Am. J. Pathol.* **1998**, *152*, 821–828.
19. Hashimoto, S.; Amaya, F.; Matsuyama, H.; Ueno, H.; Kikuchi, S.; Tanaka, M.; Watanabe, Y.; Ebina, M.; Ishizaka, A.; Tsukita, S.; et al. Dysregulation of lung injury and repair in moesin-deficient mice treated with intratracheal bleomycin. *Am. J. Physiol. Lung Cell. Mol. Physiol.* **2008**, *295*, L566–L574.
20. Liu, W.; Ding, I.; Chen, K.; Olschowka, J.; Xu, J.; Hu, D.; Morrow, G.R.; Okunieff, P. Interleukin 1 $\beta$  (IL1B) signaling is a critical component of radiation-induced skin fibrosis. *Radiat. Res.* **2006**, *165*, 181–191.
21. Christmann, R.B.; Sampaio-Barros, P.; Stifano, G.; Borges, C.L.; de Carvalho, C.R.; Kairalla, R.; Parra, E.R.; Spira, A.; Simms, R.; Capellozzi, V.L.; et al. Association of Interferon- and transforming growth factor  $\beta$ -regulated genes and macrophage activation with systemic sclerosis-related progressive lung fibrosis. *Arthritis Rheumatol.* **2014**, *66*, 714–725.
22. Park, J.H.; Chung, H.Y.; Kim, M.; Lee, J.H.; Jung, M.; Ha, H. Daumone fed late in life improves survival and reduces hepatic inflammation and fibrosis in mice. *Aging Cell* **2014**, *13*, 709–718.
23. Huang, M.; Sharma, S.; Zhu, L.X.; Keane, M.P.; Luo, J.; Zhang, L.; Burdick, M.D.; Lin, Y.Q.; Dohadwala, M.; Gardner, B.; et al. IL-7 inhibits fibroblast TGF- $\beta$  production and signaling in pulmonary fibrosis. *J. Clin. Investig.* **2002**, *109*, 931–937.
24. Okada, Y.; Shirai, K.; Reinach, P.S.; Kitano-Izutani, A.; Miyajima, M.; Flanders, K.C.; Jester, J.V.; Tominaga, M.; Saika, S. TRPA1 is required for TGF- $\beta$  signaling and its loss blocks inflammatory fibrosis in mouse corneal stroma. *Lab. Investig.* **2014**, *94*, 1030–1041.
25. Estep, J.M.; Baranova, A.; Hossain, N.; Elariny, H.; Ankrah, K.; Afendy, A.; Chandhoke, V.; Younossi, Z.M. Expression of cytokine signaling genes in morbidly obese patients with non-alcoholic steatohepatitis and hepatic fibrosis. *Obes. Surg.* **2009**, *19*, 617–624.
26. Shimizu, S.; Gabazza, E.C.; Taguchi, O.; Yasui, H.; Taguchi, Y.; Hayashi, T.; Ido, M.; Shimizu, T.; Nakagaki, T.; Kobayashi, H.; et al. Activated protein C inhibits the expression of platelet-derived growth factor in the lung. *Am. J. Respir. Crit. Care Med.* **2003**, *167*, 1416–1426.

27. Massie, C.; Hudson, M.; Tatibouet, S.; Steele, R.; Huynh, T.; Fritzler, M.J.; Baron, M.; Pineau, C.A.; Canadian Scleroderma Research Group (CSRG). Absence of an association between anti-Ro antibodies and prolonged QTc interval in systemic sclerosis: A multicenter study of 689 patients. *Semin. Arthritis Rheum.* **2014**, *44*, 338–344.
28. Wang, X.; Qian, Y.; Jin, R.; Wo, Y.; Chen, J.; Wang, C.; Wang, D. Effects of TRAP-1-like protein (TLP) gene on collagen synthesis induced by TGF- $\beta$ /Smad signaling in human dermal fibroblasts. *PLoS ONE* **2013**, *8*, e55899.
29. Komada, T.; Usui, F.; Shirasuna, K.; Kawashima, A.; Kimura, H.; Karasawa, T.; Nishimura, S.; Sagara, J.; Noda, T.; Taniguchi, S.I.; et al. ASC in renal collecting duct epithelial cells contributes to inflammation and injury after unilateral ureteral obstruction. *Am. J. Pathol.* **2014**, *184*, 1287–1298.
30. Younossi, Z.M.; Afendy, A.; Stepanova, M.; Hossain, N.; Younossi, I.; Ankrah, K.; Gramlich, T.; Baranova, A. Gene expression profile associated with superimposed non-alcoholic fatty liver disease and hepatic fibrosis in patients with chronic hepatitis C. *Liver Int.* **2009**, *29*, 1403–1412.
31. White, D.L.; Liu, Y.; Garcia, J.; El-Serag, H.B.; Jiao, L.; Tsavachidis, S.; Franco, L.M.; Lee, J.-S.; Tavakoli-Tabasi, S.; Moore, D.; et al. Sex hormone pathway gene polymorphisms are associated with risk of advanced hepatitis C-related liver disease in males. *Int. J. Mol. Epidemiol. Genet.* **2014**, *5*, 164–176.
32. Wang, W.; Liu, H.; Dai, X.; Fang, S.; Wang, X.; Zhang, Y.; Yao, H.; Zhang, X.; Chao, J. p53/PUMA expression in human pulmonary fibroblasts mediates cell activation and migration in silicosis. *Sci. Rep.* **2015**, *5*, 16900.
33. Moschen, A.R.; Fritz, T.; Clouston, A.D.; Rebhan, I.; Bauhofer, O.; Barrie, H.D.; Powell, E.E.; Kim, S.-H.; Dinarello, C.A.; Bartenschlager, R.; et al. Interleukin-32: A new proinflammatory cytokine involved in hepatitis C virus-related liver inflammation and fibrosis. *Hepatology* **2011**, *53*, 1819–1829.
34. Yee, L.J.; Tang, Y.-M.; Kleiner, D.E.; Wang, D.; Im, K.; Wahed, A.; Tong, X.; Rhodes, S.; Su, X.; Whelan, R.M.; et al. Myxovirus-1 and protein kinase haplotypes and fibrosis in chronic hepatitis C virus. *Hepatology* **2007**, *46*, 74–83.
35. Sohn, S.-H.; Lee, J.M.; Park, S.; Yoo, H.; Kang, J.W.; Shin, D.; Jung, K.-H.; Lee, Y.-S.; Cho, J.; Bae, H. The inflammasome accelerates radiation-induced lung inflammation and fibrosis in mice. *Environ. Toxicol. Pharmacol.* **2015**, *39*, 917–926.
36. Martin, T.R.; Hagimoto, N.; Nakamura, M.; Matute-Bello, G. Apoptosis and epithelial injury in the lungs. *Proc. Am. Thorac. Soc.* **2005**, *2*, 214–220.
37. Antoniou, K.M.; Tzouveleakis, A.; Alexandrakis, M.G.; Sfiridaki, K.; Tsiligianni, I.; Rachiotis, G.; Tzanakis, N.; Bouros, D.; Milic-Emili, J.; Siafakas, N.M. Different angiogenic activity in pulmonary sarcoidosis and idiopathic pulmonary fibrosis. *Chest* **2006**, *130*, 982–988.
38. Sigdel, T.K.; Bestard, O.; Tran, T.Q.; Hsieh, S.-C.; Roedder, S.; Damm, I.; Vincenti, F.; Sarwal, M.M. A Computational Gene Expression Score for Predicting Immune Injury in Renal Allografts. *PLoS ONE* **2015**, *10*, e0138133.
39. Shi, J.; Wang, H.; Guan, H.; Shi, S.; Li, Y.; Wu, X.; Li, N.; Yang, C.; Bai, X.; Cai, W.; et al. IL10 inhibits starvation-induced autophagy in hypertrophic scar fibroblasts via cross talk between the IL10-IL10R-STAT3 and IL10-AKT-mTOR pathways. *Cell Death Dis.* **2016**, *7*, e2133.
40. Bièche, I.; Asselah, T.; Laurendeau, I.; Vidaud, D.; Degot, C.; Paradis, V.; Bedossa, P.; Valla, D.-C.; Marcellin, P.; Vidaud, M. Molecular profiling of early stage liver fibrosis in patients with chronic hepatitis C virus infection. *Virology* **2005**, *332*, 130–144.
41. Keane, M.P.; Belperio, J.A.; Moore, T.A.; Moore, B.B.; Arenberg, D.A.; Smith, R.E.; Burdick, M.D.; Kunkel, S.L.; Strieter, R.M. Neutralization of the CXC chemokine, macrophage inflammatory protein-2, attenuates bleomycin-induced pulmonary fibrosis. *J. Immunol.* **1999**, *162*, 5511–5518.
42. Maluf, D.G.; Mas, V.R.; Archer, K.J.; Yanek, K.; Gibney, E.M.; King, A.L.; Cotterell, A.; Fisher, R.A.; Posner, M.P. Molecular pathways involved in loss of kidney graft function with tubular atrophy and interstitial fibrosis. *Mol. Med. Camb. Mass* **2008**, *14*, 276–285.
43. Bozyk, P.D.; Moore, B.B. Prostaglandin E2 and the pathogenesis of pulmonary fibrosis. *Am. J. Respir. Cell Mol. Biol.* **2011**, *45*, 445–452.
44. Herro, R.; Croft, M. The control of tissue fibrosis by the inflammatory molecule LIGHT (TNF Superfamily member 14). *Pharmacol. Res.* **2016**, *104*, 151–155.

45. Domagalski, K.; Pawłowska, M.; Kozielowicz, D.; Dybowska, D.; Tretyn, A.; Halota, W. The Impact of IL28B Genotype and Liver Fibrosis on the Hepatic Expression of *IP10*, *IFI27*, *ISG15*, and *MX1* and Their Association with Treatment Outcomes in Patients with Chronic Hepatitis C. *PLoS ONE* **2015**, *10*, e0130899.
46. Liu, X.; Gao, J.; Xia, Q.; Lu, T.; Wang, F. Increased mortality and aggravation of heart failure in liver X receptor- $\alpha$  knockout mice after myocardial infarction. *Heart Vessels* **2016**, *31*, 1370–1379.
